1 No evidence for highly pathogenic avian  
2 influenza virus H5N1 (clade 2.3.4.4b) in  
3 the Antarctic region during the austral  
4 summer 2022/23

5  
6 Simeon Lisovski<sup>1</sup>, Anne Günther<sup>2</sup>, Meagan Dewar<sup>3</sup>, David Ainley<sup>4</sup>, Rodrigo Arce<sup>5,6</sup>,  
7 Grant Ballard<sup>7</sup>, Josabel Belliure<sup>8</sup>, Thierry Boulinier<sup>9</sup>, Ashley Bennison<sup>10</sup>, Craig Cary<sup>11</sup>,  
8 Paulo Catry<sup>12</sup>, Augustin Clessin<sup>8</sup>, Maelle Connan<sup>13</sup>, Aidan Cox<sup>7</sup>, Juan Cristina<sup>5</sup>, Megan  
9 Elrod<sup>7</sup>, Irene Ferreira<sup>5,6</sup>, Zoe Fowler<sup>14</sup>, Amandine Gamble<sup>15,16</sup>, Joaquin Hurtado<sup>5,6</sup>,  
10 Dennis Jongsomjit<sup>7</sup>, Mathilde Lejeune<sup>9</sup>, Amélie Lescroël<sup>7</sup>, Amy Li<sup>7</sup>, Virginia Morandini<sup>17</sup>,  
11 Gonzalo Moratorio<sup>4,6,18</sup>, Teresa Militão<sup>12</sup>, Pilar Moreno<sup>5,6</sup>, Paula Perbolianachis<sup>5,6</sup>, Jean  
12 Pennycook<sup>4</sup>, Annie E. Schmidt<sup>7</sup>, Lucy Smyth<sup>13</sup>, Alvaro Soutullo<sup>19</sup>, Jérémy Tornos<sup>9</sup>,  
13 Arvind Varsani<sup>20</sup>, Ulrike Herzsich<sup>1,21,22</sup>, Martin Beer<sup>2</sup>, Michelle Wille<sup>23</sup>

14

15

16 <sup>1</sup> Alfred Wegener Institute Helmholtz Centre for Polar and Marine Research, Polar Terrestrial  
17 Environmental Systems, 14473 Potsdam, Germany.

18 <sup>2</sup> Friedrich-Loeffler-Institute, Greifswald–Insel Riems, Germany.

19 <sup>3</sup> Future Regions Research Centre, Federation University Australia

20 <sup>4</sup> H.T. Harvey & Associates Ecological Consultants, Los Gatos, CA 95032, USA

21 <sup>5</sup> Laboratorio de Virología Molecular, Centro de Investigaciones Nucleares, Facultad de  
22 Ciencias, Universidad de la República, Igua 4225, Montevideo 11400, Uruguay

23 <sup>5</sup> Laboratorio de Evolución Experimental de Virus, Institut Pasteur de Montevideo, Mataojo 2020,  
24 Montevideo 11400, Uruguay

25 <sup>7</sup> Point Blue Conservation Science. Petaluma, CA 94924, USA

26 <sup>8</sup> National Science Museum (MNCN-CSIC)

27 <sup>9</sup> Centre d'Ecologie Fonctionnelle et Evolutive (CEFE), CNRS, Université Montpellier, EPHE,  
28 IRD, Montpellier, France

29 <sup>10</sup> British Antarctic Survey, High Cross, Madingley, Cambridge, United Kingdom

30 <sup>11</sup> Thermophile Research Unit, Te Aka Mātua-tua-School of Science, Te Whare Wānanga o  
31 Waikato, University of Waikato, Hamilton, Aotearoa-New Zealand

32 <sup>12</sup> MARE – Marine and Environmental Sciences Centre / ARNET - Aquatic Research Network,  
33 Ispa – Instituto Universitário, Portugal

34 <sup>13</sup> Department of Zoology, Marine Apex Predator Research Unit (MAPRU), Institute for Coastal  
35 and Marine Research, Nelson Mandela University, Gqeberha 6001, South Africa

36 <sup>14</sup> Department of Agriculture, Bypass Road, Stanley, Falkland Islands

- 37 <sup>15</sup> School of Biodiversity, One Health & Veterinary Medicine, University of Glasgow, United  
38 Kingdom
- 39 <sup>16</sup> Department of Public & Ecosystem Health, Cornell University, New York, United States
- 40 <sup>17</sup> Departamento de Ecología Evolutiva, Museo Nacional de Ciencias Naturales, CSIC,  
41 28006 Madrid, Spain
- 42 <sup>18</sup> Centro de Innovación en Vigilancia Epidemiológica, Institut Pasteur Montevideo, Matajojo  
43 2020, Montevideo 11400, Uruguay
- 44 <sup>19</sup> Departamento de Ecología y Gestión Ambiental, Centro Universitario Regional del Este,  
45 Universidad de la Republica, Montevideo, Uruguay
- 46 <sup>20</sup> Biodesign Center for Fundamental and Applied Microbiomics, Center for Evolution and  
47 Medicine, School of Life Sciences, Arizona State University, Tempe, AZ, USA
- 48 <sup>21</sup> Institute of Biochemistry and Biology, University of Potsdam, Potsdam, Germany
- 49 <sup>22</sup> Institute of Environmental Science and Geography, University of Potsdam, Potsdam, Germany
- 50 <sup>23</sup> Centre for Pathogen Genomics, Department of Microbiology and Immunology, at the Peter  
51 Doherty Institute for Infection and Immunity, The University of Melbourne, Melbourne, Victoria,  
52 Australia

53

## 54 **Abstract**

55 The current highly pathogenic avian influenza H5N1 panzootic has profound impacts on  
56 wild birds. Herein, we compiled H5N1 surveillance from Antarctica and Sub-Antarctic  
57 Islands to ascertain whether HPAI was present in this region. Observations and HPAI  
58 testing indicated no incursion of the virus during the austral summer 2022/23.

## 59 Main text

60 The increasing intensity of highly pathogenic avian influenza virus (HPAIV) H5N1  
61 clade 2.3.4.4b outbreaks have had a profound impact on poultry and wildlife (1). Wild  
62 bird movements have underpinned the rapid spread of this virus that swept across most  
63 continents within two years (2). Compared to previous HPAIV subtypes and clades,  
64 H5N1 2.3.4.4b has significantly improved replication in wild birds (3), and increased  
65 fitness through continuous reassortments (4). Also, the virus is able to infect an  
66 unusually broad variety of wild bird species (3), which has likely facilitated this spread. In  
67 addition to their role as viral spreaders, wild birds are suffering huge losses following  
68 mass mortality events, and the scale of mortality amongst wild birds is likely in the  
69 millions rather than tens of thousands reported (5). Thus, the recent panzootic is a  
70 serious conservation concern for a large range of wild bird species.

71 Due to the absence of waterfowl species that migrate to the Antarctic and sub-  
72 Antarctic islands, the incursion risk of HPAI in notably these southernmost regions had  
73 previously been considered low. Still, waterfowl are present in northern fringes of the  
74 Southern Ocean.

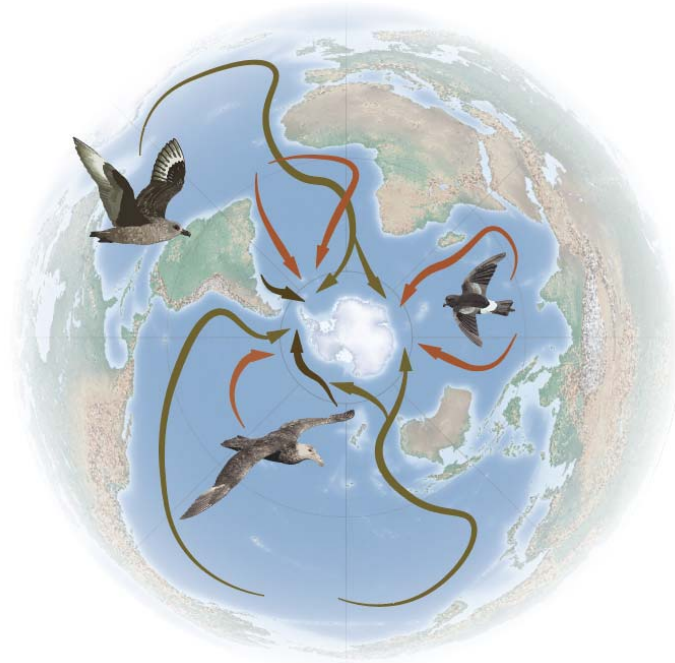

75 *Figure 1: Seabird migration routes connect the world's oceans with Antarctic and sub-Antarctic*  
76 *breeding sites. The south polar skua (Catharacta maccormicki) provides an example of trans-*  
77 *hemispheric migrations (brown arrows, top left image). Brown skuas (Catharacta antarcticus),*  
78 *Giant Petrels (Macronectes giganteus & halli, dark arrows, bottom image) and a whole range of*  
79 *albatross species remain south but can be seen in waters of South America, southern Africa,*  
80 *New Zealand, and Australia. Map made with Natural Earth.*

81           Moreover, the millions of seabirds that breed in the Antarctic region, and  
82 known migration and post-breeding dispersal routes establish links and thereby  
83 substantial global connectivity (Figure 1), including with regions of recent HPAIV H5N1  
84 outbreaks. And despite the perceived remoteness, LPAIV viruses and antibodies against  
85 these viruses have previously been detected in various seabird species nesting at sites  
86 along the Antarctic Peninsula and South Shetland Islands, with viral genomes illustrating  
87 high phylogenetic relationships to viruses circulating on other continents (6, 7). As a  
88 result, experts have considered the risk of incursion of the recent panzootic HPAI H5  
89 viruses into the Antarctic region in 2022/23 summer season to be high (8).

90           To identify a possible incursion of H5N1 into in Antarctic region during the  
91 summer season 2022/23, we sampled migratory seabirds at different locations across  
92 Antarctica and in sub-Antarctic areas (Figure 2), and collated observation data from  
93 researchers working in and around seabird colonies. In particular, we aimed to collect  
94 information pertaining to suspicious signs of unusual mortality and known clinical signs  
95 of HPAIV infection including loss of coordination and balance, trembling head and body,  
96 lethargy, respiratory distress, and conjunctivitis (8). Across all locations, sample  
97 collection was done in accordance with institutional animal ethics approval and sample  
98 testing was performed with national frameworks, with details available in the technical  
99 annex.

100           Overall, sampling and observational efforts span from early November to late  
101 March, comprising the entire austral breeding season in 2022/23, and include a large  
102 range of species (i.e., penguins, gulls, skuas, and petrels; see technical annex for more  
103 information) and locations. All swab samples collected were tested negative for avian  
104 influenza virus and thus for HPAI. Several suspicious observations of dead wild birds  
105 were recorded on the Falkland Islands (Gentoo penguin *Pygoscelis papua*, Cattle egret  
106 *Bubulcus ibis*), and South Georgia (Wandering albatrosses *Diomedea exulans*) and  
107 confirmed negative for HPAI based on qPCR testing. Taken together, and with the  
108 general lack of suspicious signs of HPAIV, we conclude that there is no evidence of  
109 HPAIV H5N1 clade 2.3.4.4b incursion into the Antarctic region during the austral  
110 summer 2022/23.

111           Obviously, incursion risk of HPAIV is contingent on a combination of factors. Most  
112 importantly, that (i) host species get in contact with HPAIV before travelling into the  
113 Antarctic regions, (ii) can migrate with an infection, and (iii) have contact with further  
114 susceptible species which could be the starting point of a new epizootic. While HPAIV  
115 (including H5N1) activity has occurred in South African seabirds since 2017, HPAIV did

116 not reach South America until ~Oct 2022, and Patagonia and Tierra del Fuego until early  
117 2023 (2, 9, 10). Furthermore, while mainly ducks were previously central to HPAIV  
118 outbreaks, the global panzootic includes a large range of bird species, and increasingly  
119 novel species groups like seabirds (11). Notably in breeding colonies of seabirds, there  
120 have been extensive outbreaks in Europe in 2022 and 2023, and the southward  
121 expansion of HPAIV H5N1 in South America was largely driven through outbreaks in  
122 coastal seabirds, including pelicans and cormorants, as well as spill-overs to coastal  
123 marine mammals with the deaths of >20,000 South American sea lions (3, 9, 12, 13).  
124 Millions of seabirds and marine mammals will again return to the Antarctic region during  
125 the austral summer (Oct 2023 - Mar 2024), and with H5N1 outbreaks now occurring very  
126 close to the Falkland Island and the Antarctic peninsula. Thus, the risk of viral incursion  
127 will be even higher compared to 2022 (14).  
128

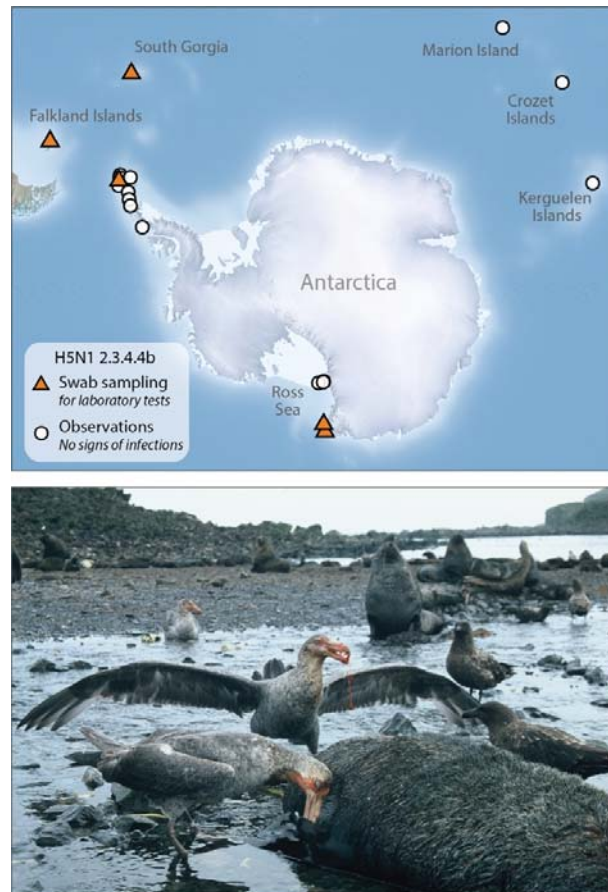

129  
130  
131  
132  
133  
134  
135

*Figure 2: (top) Sampling locations for qPCR analysis and the detection of H5N1 2.3.4.4b, as well as locations with intensive observational efforts to identify signs of HPAIV infections within breeding bird communities. (bottom) Northern giant petrels and Brown skuas scavenging on an Antarctic fur seal carcass, showing inter-species interactions with the potential for HPAI virus transmission (photo taken on South Georgia by Paulo Catry).*

136

137           The consequences of viral incursion(s) into Southern Ocean wildlife are unclear  
138 but based on observations from other regions, will likely have devastating effects.

139 Critically, densities of seabird colonies are very, facilitating the transmissions between  
140 individuals (15). Further prospecting movements of potential recruits, predator-prey  
141 interactions between bird species (e.g., skuas, penguins, and sheathbills), as well as  
142 species scavenging on dead seabirds and mammals, may promote rapid spread of the  
143 virus between colonies. The interaction between seabirds and marine mammals in the  
144 Antarctic region may also result in further transmissions to mammals and facilitate the  
145 adaptation of the virus in mammalian species. Finally, most animals of the Southern  
146 Ocean are endemic to the region, such that mass mortality events in Antarctica due to  
147 HPAI H5 will cause a very real conservation concern for many species.

148           Detecting H5N1 incursion(s) into the Antarctic region is highly relevant and  
149 surveys for mortality and sampling should therefore be prioritized during the austral  
150 summer 2023/24. These activities should be undertaken with consideration of the  
151 potentially zoonotic risks of (emerging) HPAIV H5 risks (see details in 8). Importantly,  
152 activities should not promote virus transmission within colonies nor the spatial spread  
153 between colonies and species. Nevertheless, sampling, and detailed analysis of  
154 lineages and virus phenotype will provide crucial information needed to assess risks and  
155 respond to future wild bird outbreaks.



## 156 Acknowledgements

157 We acknowledge logistical and financial support from, the Uruguayan Antarctic Institute  
158 (SL, UH, AS, RA, JC, IF, JH, GM, PP, PM), Government South Georgia and South  
159 Sandwich Islands (AB), Antarctica New Zealand (CC), Spanish Research Agency (VM),  
160 French Polar Institute (ECOPATH-1151; TB, ML, JT), ANR (ECOPATHS ANR-21-CE35-  
161 0016 and REMOVE\_DISEASE ANR-21-BIRE-006-01; TB, ML, JT), Biodiversa and  
162 Water JPI under the BiodivRestore ERA-NET Cofund (GA N°101003777; TB, MC, ML,  
163 PC), National Nature Reserve of Terres Australes et Antarctique Françaises, the South  
164 African Departments of Science and Innovation (National Research Foundation - South  
165 African National Antarctic Programme project no. 129226; MC) and of Forestry, Fisheries  
166 and the Environment, National Science Foundation award ANT 1935870 and ANT  
167 2040199 (GB, DA, ME, AC AS, AL, AL, AV, JP), the Royal Society (Newton  
168 International Fellowship NIF\R1\211869; AGa), the UK Department for Environment,  
169 Food & Rural Affairs (Darwin Plus Grant DPLUS167; AGa), Falklands Conservation, the  
170 Wildlife Conservation Society, the South Atlantic Environmental Research Institute,  
171 Falkland Islands Government (PC), FCT – Portugal through the strategic project  
172 UIDB/04292/2020 (MARE) and LA/P/0069/2020 (ARNET) and DivRestore/0012/2020  
173 (REMOVE\_DISEASE project). We thank Teresa Militão, Corisande Abiven, Katharina  
174 Reusch, Louis Pole-Evans for fieldwork support. MB and AG received financial support  
175 by the European Union Horizon Europe research program (grant agreement “Kappa-Flu  
176 No. 101084171”).

## 177 References

- 178 1. Wille M, Barr IG. Resurgence of avian influenza virus. *Science*. 2022;376(6592):459-  
179 60.
- 180 2. Adlhoch C, Fusaro A, Gonzales JL, Kuiken T, Mirnaviciute G, Niqueux EE, et al.  
181 Avian influenza overview March - April 2023. *Efsa Journal*. 2023 Jun;21(6).
- 182 3. Abolnik C, Phiri T, Peyrot B, de Beer R, Snyman A, Roberts D, et al. The Molecular  
183 Epidemiology of Clade 2.3.4.4B H5N1 High Pathogenicity Avian Influenza in  
184 Southern Africa, 2021&ndash;2022. *Viruses*; 2023.
- 185 4. Kandeil A, Patton C, Jones JC, Jeevan T, Harrington WN, Trifkovic S, et al. Rapid  
186 evolution of A(H5N1) influenza viruses after intercontinental spread to North America.  
187 *Nat Commun*. 2023 May 29;14(1):3082.
- 188 5. WOA. 2023 [cited; Available from: <https://wahis.woah.org/>

- 189 6. Hurt AC, Vijaykrishna D, Butler J, Baas C, Maurer-Stroh S, Silva-de-la-Fuente MC, et  
190 al. Detection of Evolutionarily Distinct Avian Influenza A Viruses in Antarctica. *Mbio*.  
191 2014 May-Jun;5(3).
- 192 7. de Seixas MMM, de Araujo J, Krauss S, Fabrizio T, Walker D, Ometto T, et al. H6N8  
193 avian influenza virus in Antarctic seabirds demonstrates connectivity between South  
194 America and Antarctica. *Transboundary and Emerging Diseases*. 2022 Oct 21.
- 195 8. Dewar M, Wille M, Gamble A, Vanstreels R, Boulinier T, Smith A, et al. The Risk of A  
196 vian Influenza in the Southern Ocean: A practical guide. 2022.
- 197 9. FAO. Global AIV with zoonotic potential situation update. 2023 July 2023 [cited;  
198 Available from:  
199 [https://www.fao.org/ag/againfo/programmes/en/empres/Global\\_AIV\\_Zoonotic\\_Update/situation\\_update.html](https://www.fao.org/ag/againfo/programmes/en/empres/Global_AIV_Zoonotic_Update/situation_update.html)  
200
- 201 10. Breed A, Dewar ML, Dodyk L, Kuiken T, Matus R, Serafini PP, et al. Southward  
202 expansion of high pathogenicity avian influenza H5 in wildlife in South America:  
203 estimated impact on wildlife populations, and risk of incursion into Antarctica; 2023.
- 204 11. Qiqi Y, Ben W, Phillipe L, Lu D, Tong M, Wiebe RA, et al. Synchrony of Bird  
205 Migration with Avian Influenza Global Spread; Implications for Vulnerable Bird  
206 Orders. *bioRxiv*. 2023:2023.05.22.541648.
- 207 12. Mariana L, Alejandra G-G, Breno M-S, Diana J, Patricia B, Carlos C-M, et al. Highly  
208 pathogenic avian influenza A (H5N1) in marine mammals and seabirds in Peru.  
209 *bioRxiv*. 2023:2023.03.03.531008.
- 210 13. Gunther A, Krone O, Svansson V, Pohlmann A, King J, Hallgrimsson GT, et al.  
211 Iceland as Stepping Stone for Spread of Highly Pathogenic Avian Influenza Virus  
212 between Europe and North America. *Emerging Infectious Diseases*. 2022  
213 Dec;28(12):2383-8.
- 214 14. Dewar M, Vanstreels R, Boulinier T, Cary C, Gamble A, Clessin A, et al. Risk  
215 Assessment of Highly Pathogenic Avian Influenza in the Southern Ocean Report  
216 prepared for Scientific Committee on Antarctic Research; 2023.
- 217 15. Boulinier T. Avian influenza spread and seabird movements between colonies.  
218 *Trends in Ecology & Evolution*. 2023;38(5):391-5.

219

220
